# Supplementary material for: Healthcare utilisation in overweight and obese children: a systematic review and meta-analysis
Source: HighWire-hosted journal article supplement (doi:10.1136/bmjopen-2019-035676), 2020-10-01
Supplement: bmjopen-2019-035676supp004_data_supplement.pdf [file bmjopen-2019-035676supp004_data_supplement.pdf]

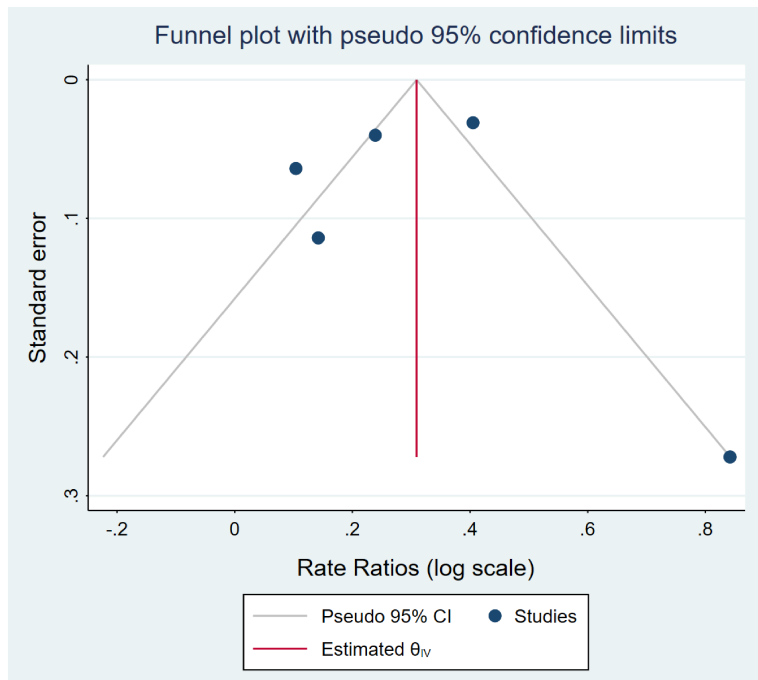

**Supplementary figure 3:** Funnel plot with pseudo 95% confidence limits for rate ratios in obese children for ED visits compared to normal weight children. The y-axis is the standard error of log rate ratio.

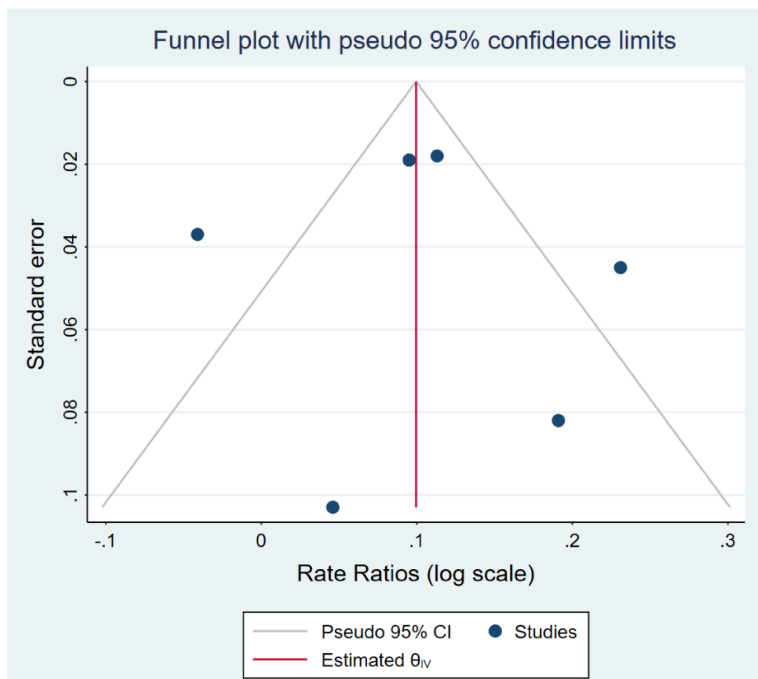

**Supplementary figure 4:** Funnel plot with pseudo 95% confidence limits for rate ratios in obese children for outpatient visits compared to normal weight children. The y-axis is the standard error of log rate ratio.
